## Nuclear DNA C-values in 30 Species Double the Familial Representation in Pteridophytes

RENATE OBERMAYER<sup>†</sup>, ILIA J. LEITCH<sup>\*</sup>, LYNDA HANSON and MICHAEL D. BENNETT  
*Jodrell Laboratory, Royal Botanic Gardens, Kew, Richmond, Surrey TW9 3DS, UK*

Received: 7 January 2002 Returned for revision: 6 March 2002 Accepted: 10 April 2002

Nuclear DNA C-values and genome size are important biodiversity characters with fundamental biological significance. Yet C-value data for pteridophytes, a diverse group of vascular plants with approx. 9000 extant species, remain scarce. A recent survey by Bennett and Leitch (2001, *Annals of Botany* 87: 335–345) found that C-values were reported for only 48 pteridophyte species. To improve phylogenetic representation in this group and to check previously reported estimates, C-values for 30 taxa in 17 families were measured using flow cytometry for all but one species. This technique proved generally applicable, but the ease with which C-value data were generated varied greatly between materials. Comparing the new data with those previously published revealed several large discrepancies. After discounting doubtful data, C-values for 62 pteridophyte species remained acceptable for analysis. The present work has increased the number of such species' C-values by 93 %, and more than doubled the number of families represented (from 10 to 21). Analysis shows that pteridophyte C-values vary approx. 450-fold, from 0.16 pg in *Selaginella kraussiana* to 72.7 pg in *Psilotum nudum* var. *gasa*. Superimposing C-value data onto a robust phylogeny of pteridophytes suggests some possible trends in C-value evolution and highlights areas for future work.

© 2002 Annals of Botany Company

**Key words:** DNA amounts, evolution of C-values, *Equisetum*, ferns, flow cytometry, genome size, Pteridophyte phylogeny, vascular plants.

### INTRODUCTION

Nuclear DNA C-values and genome size are important biodiversity characters with fundamental biological significance and many uses (Bennett and Leitch, 1995; Bennett *et al.*, 2000). In angiosperms, knowledge of C-values continues to improve. For example, C-values for 691 previously unrepresented species were recently collated by Bennett *et al.* (2000) thus increasing the percentage of species with known C-values from approx. 1 % to 1.4 %. In contrast, C-value data in pteridophytes, which comprise lycophytes (clubmosses and relatives), Equisetophyta (horsetails), Psilotophyta (whisk ferns) and Polypodiophyta (ferns), have remained scarce. At the Angiosperm Genome Size Workshop held at the Royal Botanic Gardens, Kew (RBG Kew) in September 1997, Murray reviewed our knowledge of C-values in non-angiosperm plants and noted that data were only available for approx. 0.4 % of approx. 9000 pteridophyte species, and that these had been difficult to locate (see summary of meeting at <http://www.rbgekew.org.uk/cval/conference.html>).

A recent literature survey (Bennett and Leitch, 2001) showed that since the 1997 workshop the situation for pteridophytes had changed little: DNA C-values were found for only 48 species, originating from just eight source references. Bennett and Leitch (2001) pooled these data into

one reference source and reviewed the origin, reliability and significance of the C-value estimates. A goal of obtaining first C-values for 200 pteridophyte species by 2005 was suggested, with an emphasis on selecting species that maximized systematic and geographic representation of this important vascular plant group. Here we report new work estimating C-values in 30 pteridophyte taxa, which represents the first step towards achieving this goal. Most taxa were selected with the aim of improving phylogenetic representation. In addition, several species listed in Bennett and Leitch (2001) were re-measured using fully verified material from RBG Kew with the aim of checking previous estimates. The current paper also includes C-value estimates for nine pteridophyte taxa given in Grime *et al.* (1988), a source reference not included in Bennett and Leitch (2001).

### MATERIALS AND METHODS

#### *Plant material*

Table 1 lists the 30 pteridophyte taxa studied in the present work. Material was obtained from the Living Collections Department at RBG Kew and voucher specimens for all taxa are deposited in the Herbarium (K). Table 1 also gives the verification status of each taxon. Twenty were fully verified but the specific identity of ten has not yet been fully determined. Such verification awaits spore production, and for tissue-cultured material this may not occur for several years. Estimates for these ten taxa are included, as knowledge of first C-values in a known genus is considered

\* For correspondence. Fax 00 44 (0)20 8332 5310, e-mail [i.leitch@rbgekew.org.uk](mailto:i.leitch@rbgekew.org.uk)

<sup>†</sup> Current address: Institute of Botany, University of Vienna, Rennweg 14, A-1030 Vienna, Austria

TABLE 1. The 30 pteridophyte taxa studied in the present work together with RBG Kew identity number (ID no.), identification status (ID status), angiosperm calibration standard used to estimate DNA C-values, spore type, sporangial type and sperm flagella number

| Entry no.                    | Taxon                                                                       | Family           | ID no.*    | ID status <sup>†</sup> | Standard species <sup>‡</sup> | Spore type <sup>§</sup> | Sporangial type <sup>¶</sup> | Sperm flagella** |
|------------------------------|-----------------------------------------------------------------------------|------------------|------------|------------------------|-------------------------------|-------------------------|------------------------------|------------------|
| Lycopodiophyta               |                                                                             |                  |            |                        |                               |                         |                              |                  |
| 1a                           | <i>Selaginella kraussiana</i> (Kunze) A.Br. var. <i>poolteri</i>            | Selaginellaceae  | 1998–4081  | f.v.                   | <i>Oryza</i>                  | Het                     | E                            | B                |
| 1b                           | <i>Selaginella kraussiana</i> (Kunze) A.Br. var. <i>poolteri</i>            | Selaginellaceae  | TC3646     | a.v.                   | <i>Oryza</i>                  | Het                     | E                            | B                |
| 2a                           | <i>Selaginella kraussiana</i> (Kunze) A.Br.                                 | Selaginellaceae  | POW        | f.v.                   | <i>Oryza</i>                  | Het                     | E                            | B                |
| 2b                           | <i>Selaginella kraussiana</i> (Kunze) A.Br.                                 | Selaginellaceae  | 1998–4013  | a.v.                   | <i>Oryza</i>                  | Het                     | E                            | B                |
| Psilotophyta                 |                                                                             |                  |            |                        |                               |                         |                              |                  |
| 3                            | <i>Psilotum nudum</i> (L.) Griseb. var. <i>gasa</i>                         | Psilotaceae      | 1981–4164  | f.v.                   | <i>Allium</i>                 | Hom                     | E                            | M                |
| Equisetophyta                |                                                                             |                  |            |                        |                               |                         |                              |                  |
| 4                            | <i>Equisetum debile</i> Roxb. ex Vaucher                                    | Equisetaceae     | 1974–1881  | f.v.                   | <i>Allium</i>                 | Hom                     | E                            | M                |
| 5                            | <i>Equisetum giganteum</i> <sup>††</sup>                                    | Equisetaceae     | 1974–2350  | f.v.                   | <i>Allium</i>                 | Hom                     | E                            | M                |
| 6                            | <i>Equisetum myriochaetum</i> Schldl. & Chamb                               | Equisetaceae     | 1994–3384  | f.v.                   | <i>Allium</i>                 | Hom                     | E                            | M                |
| 7                            | <i>Equisetum scirpoides</i> Michx.                                          | Equisetaceae     | 1934–97905 | f.v.                   | <i>Allium</i>                 | Hom                     | E                            | M                |
| 8                            | <i>Equisetum variegatum</i> Schleich. ex Weber & Mohr                       | Equisetaceae     | 1977–882   | f.v.                   | <i>Allium</i>                 | Hom                     | E                            | M                |
| Polypodiophyta               |                                                                             |                  |            |                        |                               |                         |                              |                  |
| Basal eusporangiate ferns    |                                                                             |                  |            |                        |                               |                         |                              |                  |
| 9                            | <i>Marattia</i> sp.                                                         | Marattiaceae     | 1973–20423 | a.v.                   | <i>Pisum</i>                  | Hom                     | E                            | M                |
| 10                           | <i>Ophioglossum gramineum</i> Willd.                                        | Ophioglossaceae  | 1981–6838  | f.v.                   | <i>Allium</i>                 | Hom                     | E                            | M                |
| 11                           | <i>Ophioglossum petiolatum</i> Hook.                                        | Ophioglossaceae  | 1988–3791  | f.v.                   | <i>Allium</i>                 | Hom                     | E                            | M                |
| Basal leptosporangiate ferns |                                                                             |                  |            |                        |                               |                         |                              |                  |
| 12                           | <i>Todea barbara</i> (L.) T.Moore                                           | Osmundaceae      | 1987–188   | a.v.                   | <i>Pisum</i>                  | Hom                     | L                            | M                |
| Filmy ferns                  |                                                                             |                  |            |                        |                               |                         |                              |                  |
| 13                           | <i>Trichomanes speciosum</i> Willd.                                         | Hymenophyllaceae | 1970–4688  | a.v.                   | <i>Pisum</i>                  | Hom                     | L                            | M                |
| Heterosporous water ferns    |                                                                             |                  |            |                        |                               |                         |                              |                  |
| 14                           | <i>Azolla microphylla</i> Kaulf.                                            | Azollaceae       | 1986–5976  | a.v.                   | <i>Oryza</i>                  | Het                     | L                            | M                |
| Tree ferns                   |                                                                             |                  |            |                        |                               |                         |                              |                  |
| 15                           | <i>Cibotium</i> sp.                                                         | Dicksoniaceae    | TC 3495    | a.v.                   | <i>Hordeum</i>                | Hom                     | L                            | M                |
| 16                           | <i>Cibotium hawaiiense</i> Nakai & Ogura                                    | Dicksoniaceae    | 1970–6171  | f.v.                   | <i>Petrosel.</i>              | Hom                     | L                            | M                |
| 17                           | <i>Cyathea crinita</i> (Hook.) Coper.                                       | Cyatheaceae      | TC 3492    | a.v.                   | <i>Pisum</i>                  | Hom                     | L                            | M                |
| 18a                          | <i>Dicksonia antarctica</i> Labill.                                         | Dicksoniaceae    | 1995–3821  | f.v.                   | <i>Pisum</i>                  | Hom                     | L                            | M                |
| 18b                          | <i>Dicksonia antarctica</i> Labill.                                         | Dicksoniaceae    | TC 3494    | a.v.                   | <i>Lycopers.</i>              | Hom                     | L                            | M                |
| 19                           | <i>Plagiogyria</i> sp.                                                      | Plagiogyriaceae  | TC 3004    | a.v.                   | <i>Pisum</i>                  | Hom                     | L                            | M                |
| 20                           | <i>Plagiogyria matsumureana</i> Makino                                      | Plagiogyriaceae  | 1979–5153  | f.v.                   | <i>Petrosel.</i>              | Hom                     | L                            | M                |
| Polypodiaceous ferns         |                                                                             |                  |            |                        |                               |                         |                              |                  |
| 21                           | <i>Cystopteris dickieana</i> R. Sim.                                        | Aspleniaceae     | 1959–74801 | a.v.                   | <i>Pisum</i>                  | Hom                     | L                            | M                |
| 22a                          | <i>Cystopteris fragilis</i> agg. (L.) Bernh.                                | Aspleniaceae     | 1983–1683  | f.v.                   | <i>Pisum</i>                  | Hom                     | L                            | M                |
| 22b                          | <i>Cystopteris fragilis</i> agg. (L.) Bernh.                                | Aspleniaceae     | 1982–2706  | a.v.                   | <i>Pisum</i>                  | Hom                     | L                            | M                |
| 22c                          | <i>Cystopteris fragilis</i> agg. (L.) Bernh.                                | Aspleniaceae     | 1987–728   | a.v.                   | <i>Pisum</i>                  | Hom                     | L                            | M                |
| 23                           | <i>Davallia denticulata</i> (Burm.f.) Mett. ex Kuhn var. <i>denticulata</i> | Davalliaceae     | 1973–5060  | f.v.                   | <i>Allium</i>                 | Hom                     | L                            | M                |
| 24                           | <i>Davallia tyermannii</i> (T.Moore) T.Moore                                | Davalliaceae     | 1990–377   | a.v.                   | <i>Allium</i>                 | Hom                     | L                            | M                |
| 25                           | <i>Dennstaedtia globulifera</i> (Poir.) Hieron                              | Dennstaedtiaceae | 1963–28204 | a.v.                   | <i>Allium</i>                 | Hom                     | L                            | M                |
| 26                           | <i>Llavea cordifolia</i> Lag.                                               | Adiantaceae      | 2000–1743  | f.v.                   | <i>Pisum</i>                  | Hom                     | L                            | M                |
| 27                           | <i>Microlepia speluncae</i> (L.) T.Moore                                    | Dennstaedtiaceae | 1974–17    | f.v.                   | <i>Allium</i>                 | Hom                     | L                            | M                |
| 28                           | <i>Nephrolepis biserrata</i> (Sw.) Schott                                   | Nephrolepidaceae | 1962–57603 | f.v.                   | <i>Allium</i>                 | Hom                     | L                            | M                |
| 29                           | <i>Nephrolepis cordifolia</i> (L.) C.Presl 'Duffi'                          | Nephrolepidaceae | 1969–17706 | f.v.                   | <i>Allium</i>                 | Hom                     | L                            | M                |
| 30                           | <i>Nephrolepis exsultata</i> (L.) Schott                                    | Nephrolepidaceae | 1969–17702 | f.v.                   | <i>Allium</i>                 | Hom                     | L                            | M                |

\* ID numbers starting with TC were derived from tissue-cultured material.

† Identification information: f.v., fully verified; a.v., awaiting verification.

‡ Calibration standard used: *Oryza* = *Oryza sativa* 'IR36', 4C = 2.02 pg; *Petrosel.* = *Petroselinum crispum* 'Champion Moss Curled', 4C = 9.00 pg; *Lycopers.* = *Lycopersicon esculentum* 'Gardener's delight', 4C = 4.00 pg; *Pisum* = *Pisum sativum* 'Minerva Maple', 4C = 19.46 pg; *Hordeum* = *Hordeum vulgare* 'Sultan', 4C = 22.24 pg; *Allium* = *Allium cepa* 'Ailsa Craig', 4C = 67.00 pg.

§ Hom, Homosporous; Het, heterosporous.

¶ L, Leptosporangiate; E, eusporangiate.

\*\* B, Biflagellate; M, multiflagellate.

useful given the scarcity of C-value data available for pteridophytes.

#### Chromosome counts

Chromosome counts were obtained from root tip squashes prepared using a standard Feulgen-stained squash technique as previously described in Hanson *et al.* (2001).

#### Estimation of nuclear DNA C-values in pteridophytes

*Flow cytometry.* Tissue of the pteridophyte sample and calibration standard was co-chopped in isolation buffer (0.1 M citric acid 1-hydrate, 1 % Triton X-100, pH 2.0), digested with RNase, filtered through a 30 µm nylon tissue and stained with the non-base-specific DNA stain propidium iodide (PI) (50 µg ml<sup>-1</sup>), as described in Obermayer and Greilhuber (1999). Co-chopping tissue of the standard and unknown sample ensured identical conditions for all material, both during nuclear isolation and in subsequent processing steps. For pteridophytes, sporophytic leaves were used in all cases (normally approx. 0.3–0.4 g of leaf material) except *Dicksonia antarctica* (ID 1995-3821) and *Cibotium hawaiense* (ID 1970-6171), where root tips from the sporophyte plant were used. For angiosperm calibration standards young leaf material was used. Since pteridophytes were found to have a large range of C-values, several different calibration standards were needed since it is recommended that the standard should have a similar C-value to the taxon being investigated. Technical errors in DNA estimation may increase if the C-values for the standard and unknown are too dissimilar (Bennett and Leitch, 1995; Price and Johnston, 1996). The particular standard chosen was determined empirically for each taxon investigated and is given in Table 1. The 4C-values of these calibration standards, used to convert arbitrary units into absolute amounts, were taken from Bennett and Leitch (1995) except for two new calibration standards *Petroselinum crispum* 'Champion Moss Curled' and *Lycopersicon esculentum* 'Gardener's delight', whose 4C-values were determined as follows. For *L. esculentum*, eight plants (30 preparations) were measured against the standard *Zea mays* 'Va35'. With a 4C-value of 10.93 pg for Va35 (Bennett and Leitch, 1995), this gave a 4C amount of 4.0 pg (s.d. = 0.07 pg) for *L. esculentum* 'Gardener's delight', which agrees closely with estimates for two other cultivars also measured using flow cytometry with PI (i.e. 4C = 3.8 pg, Michaelson *et al.*, 1991; 4C = 3.9 pg, Dolezel *et al.*, 1992). For *Petroselinum crispum*, six plants (27 preparations), were measured against the new calibration standard *L. esculentum* 'Gardener's delight'. This gave a 4C-value of 9.0 pg (s.d. = 0.19 pg) for *P. crispum* 'Champion Moss Curled', which agrees closely with 4C = 8.9 pg given by Yokoya *et al.* (2000).

Samples were analysed on a Partec PA II flow cytometer (Münster, Germany), equipped with a 100 W high pressure mercury lamp, a quartz air objective (50× 0.82 N.A.) and a high-quality red sensitive photo-multiplier. The filter com-

ination used was KG1, BG38, EM520, TK560 (to/from objective), 2 × 3 (diaphragm), TK560 and RG590. The bandpass filter EM520 was from Partec; all other filters were from Schott (Mainz, Germany). As sheath fluid, distilled water was used. The correct functioning of the cytometer was tested on a regular basis using chicken red blood cells. For each pteridophyte taxon, three preparations of unknown and standard material were usually made and each was analysed three times (5000 nuclei per run). Coefficients of variation (CVs) were usually less than 3 %, otherwise the number of preparations was increased. To calculate the absolute DNA amount, first the peak ratio (PR) between the positions of G<sub>1</sub> fluorescence peaks of the pteridophyte sample and calibration standard was calculated as follows: PR = mean channel number of sample/mean channel number of standard. Absolute 2C DNA values (pg) of each pteridophyte species were then calculated according to the following formula: PR × mean 2C-value of calibration standard used.

*Feulgen microdensitometry.* The DNA C-value for *Trichomanes speciosum* was determined by Feulgen microdensitometry using the methods described in Hanson *et al.* (2001) and *Pisum sativum* 'Minerva Maple' (4C = 19.46 pg) as the calibration standard.

## RESULTS AND DISCUSSION

#### Chromosome counts

No count was obtained for ten species. Counts for four species (i.e. *Equisetum giganteum*, *E. myriochaetum*, *Trichomanes speciosum* and *Dicksonia antarctica*) were unobtainable as roots could not be taken without risk of damaging delicate living specimens. For six other taxa, no dividing or countable dividing cell was found in root material, and none was producing sporangia from which meiotic preparations could be made. However, Table 2 gives a count or an estimated chromosome number (2n) for the remaining 20 taxa studied. Chromosome numbers ranged from 2n = 30 in *Selaginella kraussiana* var. *poolteri* to 2n = approx. 960 in *Ophioglossum petiolatum*. A survey of Löve *et al.* (1977) and the Indexes to Plant Chromosome Numbers series published by The Missouri Botanical Garden (e.g. <http://mobot.mobot.org/W3T/Search/ipcn.html>) showed that there were two new species counts: 2n = approx. 216 in *Equisetum scirpoides* and 2n = approx. 80 in *Davallia tyermannii*. Both agreed with previously published counts for related species.

Four of the chromosome counts represented new ploidy levels. In *Selaginella kraussiana*, all previously published counts were 2n = 20, which is considered to be diploid. In the present work, counts of 2n = 30 and 40 were obtained and thus represent triploid and tetraploid cytotypes. In *Ophioglossum gramineum*, 2n = approx. 720 was obtained in contrast to a previous report of 2n = 240 (Khandelwal, 1990). The base number in this genus is controversial. Löve *et al.* (1977) considered it to be x = 15, whereas Khandelwal (1990) gave x = 30. The present count may thus be 24- or 48-

TABLE 2. DNA C-values for 30 pteridophyte taxa studied, together with chromosome numbers obtained (2n) in the present work and counts published in Löve et al. (1977) or taken from the Indexes to Plant Chromosome Numbers

| Entry no.                    | Taxon                                               | Family           | 2n   | Published 2n* | DNA amount <sup>†</sup> |         |              |             |
|------------------------------|-----------------------------------------------------|------------------|------|---------------|-------------------------|---------|--------------|-------------|
|                              |                                                     |                  |      |               | 1C (Mbp) <sup>‡</sup>   | 1C (pg) | 2C(pg)       | 4C (pg)     |
| Lycopodiophyta               |                                                     |                  |      |               |                         |         |              |             |
| 1a                           | <i>Selaginella kraussiana</i> var. <i>poolteri</i>  | Selaginellaceae  | 30   | 20            | 230                     | 0.24    | 0.47 ± 0.004 | 0.95        |
| 1b                           | <i>Selaginella kraussiana</i> var. <i>poolteri</i>  | Selaginellaceae  | —    | 20            | 240                     | 0.24    | 0.48 ± 0.007 | 0.96        |
| 2a                           | <i>Selaginella kraussiana</i>                       | Selaginellaceae  | —    | 20            | 160                     | 0.16    | 0.32 ± 0.003 | 0.65        |
| 2b                           | <i>Selaginella kraussiana</i>                       | Selaginellaceae  | 40   | 20            | 350                     | 0.36    | 0.71 ± 0.013 | 1.42        |
| Psilotophyta                 |                                                     |                  |      |               |                         |         |              |             |
| 3                            | <i>Psilotum nudum</i> var. <i>gasa</i>              | Psilotaceae      | —    | 104, 156, 208 | 71 210                  | 72.7    | 145.3 ± 0.58 | 290.7       |
| Equisetophyta                |                                                     |                  |      |               |                         |         |              |             |
| 4                            | <i>Equisetum debile</i>                             | Equisetaceae     | ~216 | 216           | 25 700                  | 26.2    | 52.5 ± 0.24  | 104.9       |
| 5                            | <i>Equisetum giganteum</i>                          | Equisetaceae     | —    | 216*          | 25 610                  | 26.1    | 52.3 ± 0.49  | 104.5       |
| 6                            | <i>Equisetum myriochaetum</i>                       | Equisetaceae     | —    | 216*          | 25 140                  | 25.7    | 51.3 ± 0.40  | 102.6       |
| 7                            | <i>Equisetum scirpoides</i>                         | Equisetaceae     | ~216 | 216*          | 20 820                  | 21.3    | 42.5 ± 0.04  | 85.0        |
| 8                            | <i>Equisetum variegatum</i>                         | Equisetaceae     | ~216 | 216           | 29 740                  | 30.4    | 60.7 ± 0.19  | 121.4       |
| Polypodiophyta               |                                                     |                  |      |               |                         |         |              |             |
| Basal eusporangiate ferns    |                                                     |                  |      |               |                         |         |              |             |
| 9                            | <i>Marattia</i> sp.                                 | Marattiaceae     | 78   | 78*, 156*     | 7510                    | 7.7     | 15.3 ± 0.49  | 30.6        |
| 10                           | <i>Ophioglossum gramineum</i>                       | Ophioglossaceae  | ~720 | 240           | 63 480                  | 64.8    | 129.6 ± 4.38 | 259.1       |
| 11                           | <i>Ophioglossum petiolatum</i>                      | Ophioglossaceae  | ~960 | 960, 1020     | 64 240                  | 65.6    | 131.1 ± 3.86 | 262.2       |
| Basal leptosporangiate ferns |                                                     |                  |      |               |                         |         |              |             |
| 12                           | <i>Todea barbara</i>                                | Osmundaceae      | 44   | 44            | 20 590                  | 21.0    | 42.0 ± 0.34  | 84.1        |
| Filmy ferns                  |                                                     |                  |      |               |                         |         |              |             |
| 13                           | <i>Trichomanes speciosum</i>                        | Hymenophyllaceae | —    | 144           | 10 520                  | 10.7    | 21.5         | 42.9 ± 2.98 |
| Heterosporous water ferns    |                                                     |                  |      |               |                         |         |              |             |
| 14                           | <i>Azolla microphylla</i>                           | Azollaceae       | 44   | 44, 66        | 750                     | 0.8     | 1.5 ± 0.04   | 3.1         |
| Tree ferns                   |                                                     |                  |      |               |                         |         |              |             |
| 15                           | <i>Cibotium</i> sp.                                 | Dicksoniaceae    | —    | 136*          | 6960                    | 7.1     | 14.2 ± 0.59  | 28.4        |
| 16                           | <i>Cibotium hawaiiense</i>                          | Dicksoniaceae    | ~130 | 136*          | 7120                    | 7.3     | 14.5 ± 0.32  | 29.1        |
| 17                           | <i>Cyathea crinita</i>                              | Cyatheaceae      | —    | 138           | 7200                    | 7.4     | 14.7 ± 0.33  | 29.4        |
| 18a                          | <i>Dicksonia antarctica</i>                         | Dicksoniaceae    | —    | 130*          | 11 260                  | 11.5    | 23.0 ± 0.27  | 46.0        |
| 18b                          | <i>Dicksonia antarctica</i>                         | Dicksoniaceae    | —    | 130*          | 11 400                  | 11.6    | 23.3 ± 0.41  | 46.5        |
| 19                           | <i>Plagiogyria</i> sp.                              | Plagiogyriaceae  | —    | 130*, 260*    | 24 950                  | 25.5    | 50.9 ± 0.33  | 101.8       |
| 20                           | <i>Plagiogyria matsumureana</i>                     | Plagiogyriaceae  | —    | 130*          | 12 320                  | 12.6    | 25.1 ± 0.29  | 50.3        |
| Polypodiaceous ferns         |                                                     |                  |      |               |                         |         |              |             |
| 21                           | <i>Cystopteris dickieana</i>                        | Aspleniaceae     | 168  | 168           | 8110                    | 8.3     | 16.6 ± 0.21  | 33.1        |
| 22a                          | <i>Cystopteris fragilis</i> agg.                    | Aspleniaceae     | ~168 | 168           | 8120                    | 8.3     | 16.6 ± 0.13  | 33.1        |
| 22b                          | <i>Cystopteris fragilis</i> agg.                    | Aspleniaceae     | —    | 168           | 8160                    | 8.3     | 16.7 ± 0.30  | 33.3        |
| 22c                          | <i>Cystopteris fragilis</i> agg.                    | Aspleniaceae     | —    | 168           | 8180                    | 8.3     | 16.7 ± 0.06  | 33.4        |
| 23                           | <i>Davallia denticulata</i> var. <i>denticulata</i> | Davalliaceae     | ~80  | 80            | 11 290                  | 11.5    | 23.0 ± 0.24  | 46.1        |
| 24                           | <i>Davallia tyermannii</i>                          | Davalliaceae     | ~80  | 80*           | 7790                    | 8.0     | 15.9 ± 0.11  | 31.8        |
| 25                           | <i>Dennstaedtia globulifera</i>                     | Dennstaedtiaceae | ~176 | 94            | 12 890                  | 13.2    | 26.3 ± 0.32  | 52.6        |
| 26                           | <i>Llavea cordifolia</i>                            | Adiantaceae      | —    | 58            | 7510                    | 7.7     | 15.3 ± 0.06  | 30.7        |
| 27                           | <i>Microlepia speluncae</i>                         | Dennstaedtiaceae | 172  | 86, 172, 258  | 7780                    | 7.9     | 15.9 ± 0.12  | 31.8        |
| 28                           | <i>Nephrolepis biserrata</i>                        | Nephrolepidaceae | ~82  | 82            | 9330                    | 9.5     | 19.0 ± 0.20  | 38.1        |
| 29                           | <i>Nephrolepis cordifolia</i> 'Duffi'               | Nephrolepidaceae | ~82  | 82            | 6680                    | 6.8     | 13.6 ± 0.08  | 27.3        |
| 30                           | <i>Nephrolepis exsultata</i>                        | Nephrolepidaceae | 82   | 82            | 9370                    | 9.6     | 19.1 ± 0.35  | 38.2        |

\* Where no chromosome count was published for the species, counts for other species in the same genus are given and marked with an asterisk.

<sup>†</sup> For all species except *Trichomanes speciosum*, 2C-values were determined by flow cytometry from the G<sub>1</sub> peak of the flow histogram. For *Trichomanes speciosum*, 4C-values were obtained from measurements made on prophase cells using Feulgen microdensitometry. Standard deviation for each DNA amount is given with the original data.

<sup>‡</sup> Conversion factor used 1 pg = 980 Mb (Cavalier-Smith, 1985).

ploid depending on which base number is accepted. The count for *Dennstaedtia globulifera* of 2n = approx. 176 is around double the previous report of 2n = 94 for this species. Since the base number for this genus is unclear due to a range of chromosome numbers reported for different *Dennstaedtia* species, the ploidy level of the count is also

unclear. The remaining 14 chromosome counts all agree with previously published counts for the species.

Counts from root tips of the remaining ten species were unobtainable. For four species (i.e. *Equisetum giganteum*, *E. myriochaetum*, *Dicksonia antarctica* and *Trichomanes speciosum*), this was because the material was no longer

available or too fragile to allow roots to be harvested. For the remaining six taxa, attempts to obtain counts were unsuccessful as no dividing cells could be found in the root material and none of the plants were producing sporangia from which meiotic preparations could be made.

#### Estimating pteridophyte DNA C-values by flow cytometry

Flow cytometry is a widely used method of choice for estimating C-values in plants as it can estimate large numbers of cells easily and rapidly (e.g. Galbraith *et al.*, 1983; Price and Johnston, 1996). However, it has some limitations (Bennett and Leitch, 1995) and users rarely mention or assess difficulties, although some have been reported (e.g. Marie and Brown, 1993; Yokoya *et al.*, 2000). In the present work, all but one of the C-values in Table 2 were estimated by flow cytometry. Prior to this, Bennett and Leitch (2001) listed C-values for 13 species estimated by this technique. These were taken from Redondo *et al.* (1999*a, b*), but the authors did not comment on the ease of use or applicability of the technique (i.e. no CVs or flow histograms were given).

In the present work, flow cytometry proved to be capable of producing distinct peaks in flow histograms for species whose C-values spanned the entire range encountered in pteridophytes so far (i.e.  $1C = 0.16\text{--}72.67$  pg, see Fig. 1). However, the ease of obtaining data varied considerably between taxa. Some, including *Equisetum*, *Ophioglossum*, *Psilotum* and some 'polypodiaceous' ferns such as *Llavea*, *Davallia*, *Microlepia*, *Nephrolepis* and *Dennstaedtia*, were relatively easy to measure. Others proved more problematic, giving peaks with unacceptably high CVs, or, in the worst case (i.e. *Trichomanes speciosum*), no peaks at all. To overcome these problems various approaches were taken. In some cases, peaks could be obtained by increasing the amount of leaf material used. For example, in *Plagiogyria matsumureana*, approx. five times the normal amount of leaf material was needed to obtain peaks in the flow histogram. In other cases, problems were overcome by using root instead of leaf material (e.g. *Dicksonia* and *Cibotium*). For *Trichomanes speciosum*, which gave no discernible peaks in the flow histogram, no solution was found in the current study. For this one species a C-value was estimated using Feulgen microdensitometry. However, five other species also proved intractable using flow cytometry and still await C-value estimation by any method.

We conclude that whilst flow cytometry can be used to estimate accurately DNA amounts in most pteridophyte taxa over a wide range of C-values, the ease and speed with which data are generated varies between materials. Further work is needed to optimize the method (e.g. modify buffer composition, alter stain concentration, etc.) to increase the potential of flow cytometry for estimating C-values in a significant minority of pteridophytes.

#### Survey of DNA C-values in pteridophytes

Table 2 lists C-values for 30 taxa in 17 different pteridophyte families estimated in the present work. In four taxa (i.e. *Selaginella kraussiana* var. *poolteri*, *S.*

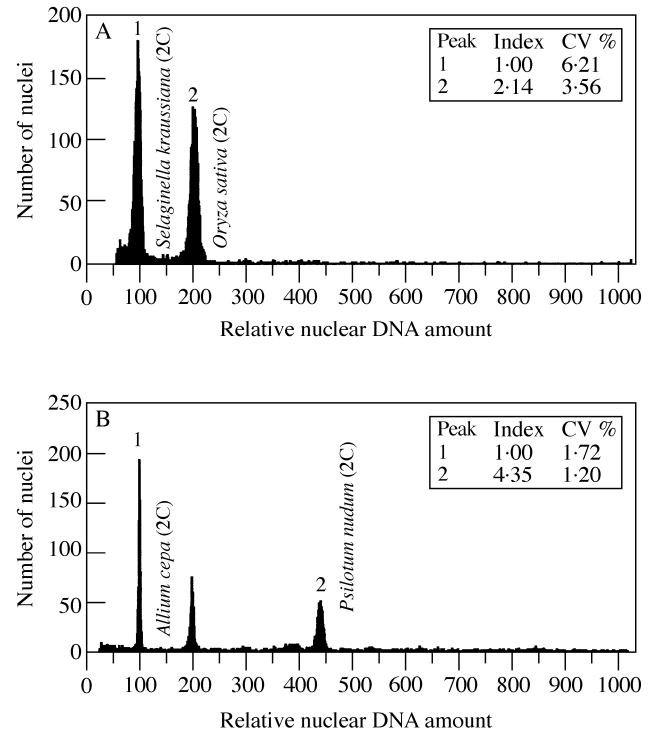

FIG. 1. Flow histograms of fluorescence intensity in nuclei isolated from pteridophytes and the relevant calibration standard after propidium iodide staining. A. *Selaginella kraussiana* run with calibration standard *Oryza sativa*. B. *Psilotum nudum* var. *gasa* run with calibration standard *Allium cepa*.

*kraussiana*, *Dicksonia antarctica* and *Cystopteris fragilis*), more than one estimate was made using material from different sources. With one exception, C-value estimates for different accessions of each taxon agreed closely (e.g. *Dicksonia antarctica*  $1C = 11.5$  and  $11.6$  pg), showing that the technique is consistent and reliable. In *S. kraussiana*,  $1C$ -values of  $0.16$  and  $0.36$  pg were reported. Although no chromosome counts could be obtained for the accession with  $1C = 0.16$  pg, counts of  $2n = 30$  and  $2n = 40$  were obtained for *S. kraussiana* var. *poolteri* ID 1998-4081 ( $1C = 0.24$  pg) and *S. kraussiana* ID 1998-4013 ( $1C = 0.36$  pg), respectively. Since the base number for *Selaginella* is  $x = 10$ , the  $1C$ -values of  $0.16$  and  $0.36$  pg presumably correspond to diploid and tetraploid cytotypes, respectively. Thus the genome size (i.e.  $2C$  DNA amount divided by ploidy level) for *S. kraussiana* is approx.  $0.16$  pg.

In the four species with more than one C-value, the estimate considered most reliable (e.g. from fully verified and/or naturally growing material rather than from tissue-cultured samples or material awaiting full verification) was assigned as the prime value (c.f. Bennett and Smith, 1976) and given an 'a' after the entry number in column 1 of Tables 1 and 2. Prime values for these taxa were used in the analysis described below.

Comparing the 30 C-values in Table 2 with those compiled in Bennett and Leitch (2001) revealed some large discrepancies, such that only 24 of the 48 previously compiled estimates are now considered acceptable (see

TABLE 3. DNA C-values for nine pteridophyte taxa included in Grime et al. (1988), together with information on chromosome number, ploidy level, spore type, sporangial type and sperm flagella number

| Taxon                                                                           | Family           | 2n  | Ploidy level | Spore type* | Sporangial type† | Sperm flagella‡ | DNA amount |         |         |         |
|---------------------------------------------------------------------------------|------------------|-----|--------------|-------------|------------------|-----------------|------------|---------|---------|---------|
|                                                                                 |                  |     |              |             |                  |                 | 1C (Mbp)§  | 1C (pg) | 2C (pg) | 4C (pg) |
| Equisetophyta                                                                   |                  |     |              |             |                  |                 |            |         |         |         |
| <i>Equisetum arvense</i> L.                                                     | Equisetaceae     | 216 | 2            | Hom         | E                | M               | 13 920     | 14.2    | 28.4    | 56.8    |
| <i>Equisetum fluviatile</i> L.                                                  | Equisetaceae     | 216 | 2            | Hom         | E                | M               | 13 230     | 13.5    | 27.0    | 54.0    |
| <i>Equisetum palustre</i> L.                                                    | Equisetaceae     | 216 | 2            | Hom         | E                | M               | 12 250     | 12.5    | 25.0    | 50.0    |
| Polypodiophyta                                                                  |                  |     |              |             |                  |                 |            |         |         |         |
| Leptosporangiate ferns                                                          |                  |     |              |             |                  |                 |            |         |         |         |
| <i>Asplenium ruta-muraria</i> L.                                                | Aspleniaceae     | 144 | 4            | Hom         | L                | M               | 5150       | 5.3     | 10.5    | 21.0    |
| <i>Asplenium trichomanes</i> L. ssp. <i>quadrivalens</i> D.E.Meyer emend. Lovis | Aspleniaceae     | 144 | 4            | Hom         | L                | M               | 6710       | 6.9     | 13.7    | 27.4    |
| <i>Athyrium filix-femina</i> (L.) Roth                                          | Athyriaceae      | 80  | 2            | Hom         | L                | M               | 2890       | 3.0     | 5.9     | 11.8    |
| <i>Dryopteris dilatata</i> (Hoffm.) A. Gray                                     | Dryopteridaceae  | 164 | 4            | Hom         | L                | M               | 7890       | 8.1     | 16.1    | 32.2    |
| <i>Dryopteris filix-mas</i> (L.) Schott                                         | Dryopteridaceae  | 164 | 4            | Hom         | L                | M               | 8530       | 8.7     | 17.4    | 34.8    |
| <i>Pteridium aquilinum</i> (L.) Kuhn                                            | Dennstaedtiaceae | 104 | 2            | Hom         | L                | M               | 6270       | 6.4     | 12.8    | 25.6    |

\* Hom, Homosporous; Het, heterosporous.

† L, Leptosporangiate; E, eusporangiate.

‡ B, Biflagellate; M, multiflagellate.

§ Conversion factor used 1 pg = 980 Mb (Cavalier-Smith, 1985).

TABLE 4. Mean, minimum (min.), and maximum (max.) 1C nuclear DNA amounts for 21 families of pteridophytes for which C-value data are available

| Higher group                 | Family           | Number of species with C-values | 1C nuclear DNA amount (pg) |      |      |
|------------------------------|------------------|---------------------------------|----------------------------|------|------|
|                              |                  |                                 | Mean                       | Min. | Max. |
| Lycopodiophyta               | Selaginellaceae  | 2                               | 0.2                        | 0.16 | 0.24 |
| Psilotophyta                 | Psilotaceae      | 1                               | 72.7                       | 72.7 | 72.7 |
| Equisetophyta                | Equisetaceae     | 8                               | 21.2                       | 12.5 | 30.4 |
| Polypodiophyta               |                  |                                 |                            |      |      |
| Basal eusporangiate ferns    |                  |                                 |                            |      |      |
|                              | Ophioglossaceae  | 2                               | 65.2                       | 64.8 | 65.6 |
|                              | Marattiaceae     | 1                               | 7.7                        | 7.7  | 7.7  |
| Basal leptosporangiate ferns |                  |                                 |                            |      |      |
|                              | Osmundaceae      | 1                               | 21.0                       | 21.0 | 21.0 |
| Filmy ferns                  | Hymenophyllaceae | 1                               | 10.7                       | 10.7 | 10.7 |
| Heterosporous water ferns    |                  |                                 |                            |      |      |
|                              | Azollaceae       | 1                               | 0.8                        | 0.8  | 0.8  |
| Tree ferns                   |                  |                                 |                            |      |      |
|                              | Cyatheaceae      | 1                               | 7.4                        | 7.4  | 7.4  |
|                              | Plagiogyriaceae  | 2                               | 19.0                       | 12.6 | 25.5 |
|                              | Dicksoniaceae    | 3                               | 8.6                        | 7.1  | 11.5 |
| Polypodiaceous ferns         |                  |                                 |                            |      |      |
|                              | Adiantaceae      | 1                               | 7.7                        | 7.7  | 7.7  |
|                              | Aspleniaceae     | 13                              | 6.7                        | 4.2  | 8.3  |
|                              | Athyriaceae      | 1                               | 3.0                        | 3.0  | 3.0  |
|                              | Davalliaceae     | 2                               | 9.7                        | 8.0  | 11.5 |
|                              | Dennstaedtiaceae | 4                               | 9.2                        | 6.4  | 13.2 |
|                              | Dryopteridaceae  | 2                               | 8.4                        | 8.1  | 8.7  |
|                              | Nephrolepidaceae | 3                               | 8.6                        | 6.8  | 9.6  |
|                              | Parkeriaceae     | 1                               | 3.8                        | 3.8  | 3.8  |
|                              | Woodsiaceae      | 1                               | 5.9                        | 5.9  | 5.9  |
|                              | Polypodiaceae    | 11                              | 12.8                       | 7.5  | 19.7 |

below). Prior to the present work, reliable C-values were available for 32 species; 24 compiled in Bennett and Leitch (2001) plus eight of the nine species included in Grime et al. (1988; see Table 3). The remaining species in Grime et al. (*Asplenium trichomanes* ssp. *quadrivalens*, 1C = 6.9 pg) was already included in Bennett and Leitch (2001) who listed a similar 1C-value of 7.7 pg taken from Redondo et al. (1999b). The present work has thus increased the number of

species with C-value estimates acceptable for analysis by 93 %, to give a total of 62 species. It has therefore contributed significantly to the goal of obtaining first C-values for 200 pteridophyte taxa by 2005 (Bennett and Leitch, 2001).

The present data have also contributed towards increasing familial coverage, as first C-values for 11 families not included in Bennett and Leitch (2001) are reported here.

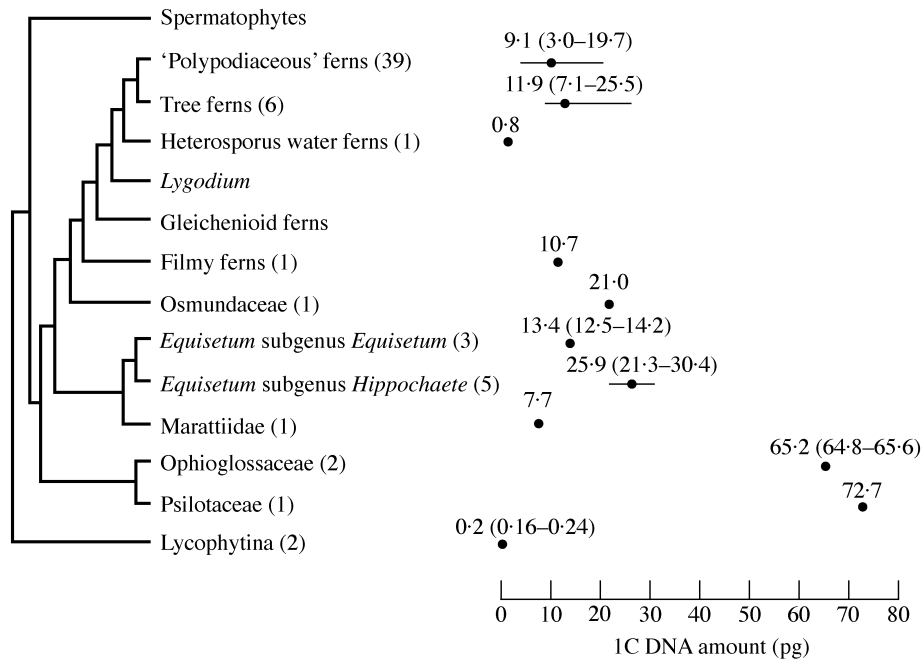

FIG. 2. Pteridophyte phylogeny (left, based on Pryer *et al.*, 2001) and C-value data (right) showing the mean and range of C-values in each of the major branches of the phylogeny. The number in parentheses following the branch name gives the number of species with C-value data.

The number of pteridophyte families represented by C-value data has now more than doubled from 10 to 21. Since a total of only approx. 35 pteridophyte families is recognized (e.g. Mabberley, 1997; Wolf *et al.*, 1998), the present work has increased familial representation from approx. 29 to 60 %. A summary of the known data and ranges of C-values for all 21 families with C-value data is given in Table 4.

Analysis of the data for 62 species shows that C-values in pteridophytes varied approx. 450-fold, from 0.16 pg in *Selaginella kraussiana* to 72.7 pg in *Psilotum nudum* var. *gasa*. The smallest C-value for fully verified material of *S. kraussiana* (0.16 pg) was noted to be 2.6 times larger than values reported by Bouchard (1976) for five *Selaginella* species (all approx. 0.06 pg). The present work shows that whilst *Selaginella* still has the smallest nuclear DNA amount yet known for any pteridophyte, its C-value is not so small as to approach the theoretical minimum for a plant as previously suggested (Bennett and Leitch, 2001). However, its C-value is similar to estimates reported for the angiosperm *Arabidopsis thaliana* (e.g. 1C = 0.17 pg, Marie and Brown, 1993; 1C = 0.18 pg, Bennett and Smith, 1991), which is widely studied as a model plant species partly due to its small genome size. The highest C-value estimated here was for *Psilotum nudum* var. *gasa* (1C = 72.7 pg), and is the largest known to us for any pteridophyte so far estimated. This large C-value agrees with previous observations that *Psilotum* has some of the largest chromosomes in pteridophytes (4.5–18  $\mu\text{m}$  long; Abraham *et al.*, 1962). However, the present value is 35 times greater than a 1C-estimate of approx. 2.0 pg given by Bouchard (1976) for a *Psilotum* species, which raises doubts over the latter value as suggested in Bennett and

Leitch (2001). Indeed a further inconsistency was observed between the C-value reported for *Equisetum variegatum* in the present work (30.4 pg) and that given in Bouchard (1976; 1C = 12.15 pg). Whether these C-value discrepancies are taxonomic, methodological or due to some other factor(s) is not known. However, Bennett and Leitch (2001) noted that the paper with data from Bouchard's thesis (Bouchard, 1976) was withdrawn from publication. In view of these concerns and inconsistencies, Bouchard's data were excluded from the analysis presented below and it is suggested that C-value estimates for species from this source should be viewed with caution until independently confirmed.

#### Phylogenetic survey of C-values in pteridophytes

To interpret the evolutionary significance of the approx. 450-fold range of C-values requires a robust phylogeny of pteridophytes. Recent work combining DNA sequence data of four genes together with morphological data has clarified relationships among the different pteridophyte groups, both to each other and to the other vascular plant group—the seed plants (gymnosperms and angiosperms; Pryer *et al.*, 2001). This analysis gave strong support for three clades of extant vascular plants: (1) lycophytes (Lycopodiaceae, Selaginellaceae and Isoetaceae); (2) seed plants (Spermatophytes); and (3) a clade containing the horsetails (Equisetophyta), whisk ferns (Psilotophyta) and all eusporangiate and leptosporangiate ferns (referred to below as the horsetail-fern clade). Pryer *et al.* (2001) also showed unambiguously that the third clade contained the closest living relatives to seed plants.

The species whose C-values were estimated in the present work were selected to improve phylogenetic coverage for pteridophytes, such that a C-value estimate is now available for most of the major pteridophyte clades given in Pryer *et al.* (2001). Given this improved representation of C-values in pteridophytes and the well-supported phylogeny, evaluation of the phylogenetic component of C-value variation can begin. In angiosperms, Leitch *et al.* (1998) superimposed DNA C-values onto a robust phylogenetic tree and concluded that ancestral angiosperms almost certainly had small genomes (defined as  $1C \leq 3.5$  pg; see Leitch *et al.*, 1998). Figure 2 superimposes the C-value data for the different pteridophyte groups onto the phylogeny of Pryer *et al.* (2001) in a similar way.

Whilst it is recognized that such an analysis is limited due to the paucity of data, it is useful as it highlights gaps in the data that need to be targeted in future work (see below). In addition, three points of interest are noted: (1) The smallest C-value in the horsetail-fern clade was reported for *Azolla microphylla* ( $1C = 0.8$  pg) in the heterosporous water fern clade. The next largest C-value recorded is 3.8 times larger for *Athyrium filix-femina* ( $1C = 3.0$  pg). Although only one C-value is currently available for this clade, the three families that comprise this group (i.e. Azollaceae, Salviniaceae and Marsileaceae) are typically characterized by possessing low numbers (Klekowski and Baker, 1966) of small chromosomes (e.g. Abraham *et al.*, 1962; Loyal, 1972; Nakato, 1996). Low C-values may be typical of this clade and, if so, may be secondarily derived.

(2) The clade comprising two eusporangiate families, Ophioglossaceae and Psilotaceae, is characterized by species with the highest C-values so far encountered in any pteridophyte [i.e. *Ophioglossum gramineum* ( $1C = 64.8$ ), *O. petiolatum* ( $1C = 65.6$  pg) and *Psilotum nudum* var. *gasa* ( $1C = 72.7$  pg)]. These values are more than double the next largest C-value reported for a pteridophyte (*Equisetum variegatum*,  $1C = 30.4$  pg). It is hypothesized that the large C-values in this clade represent a derived character. Interestingly, these large C-values have apparently involved two different cytological processes, namely increased ploidy levels and changes in chromosome size. Thus, relative to *Psilotum*, *Ophioglossum* is characterized by possessing numerous, small chromosomes (1.5–4.5  $\mu$ m long; Abraham *et al.*, 1962, and  $2n$  up to 1440; Khandelwal, 1990), whereas *Psilotum* is characterized by fewer ( $2n = 104, 156$  and  $208$ ), but larger chromosomes (4.5–18  $\mu$ m; Abraham *et al.*, 1962).

(3) C-values are available for eight of the 15 recognized *Equisetum* species (see data in Tables 2 and 3), ranging from 12.5 to 30.4 pg. However, their distribution is discontinuous with two size classes, namely  $1C = 12.5$ – $14.2$  pg and  $21.3$ – $30.4$  pg. Phylogenetically, *Equisetum* is divided into two distinct branches (Des Marais *et al.*, 2001; Pryer *et al.*, 2001) which correspond to the morphologically recognized subgenera *Equisetum* and *Hippochaete* (Hauke, 1963, 1978). Interestingly, the two size classes of C-values noted above correspond to the two subgenera. Species in subgenus *Hippochaete* (= *E. debile*, *E. giganteum*, *E. myriochaetum*, *E. scirpoides* and *E. variegatum*) are characterized by C-values (range 21.3–30.4 pg) whose mean

( $1C = 25.9$  pg) is approx. double that of species in subgenus *Equisetum* (= *E. arvense*, *E. fluviatile* and *E. palustre*; mean  $1C = 13.4$  pg; range 12.5–14.2 pg). The difference in mean C-values was found to be highly significant ( $P < 0.001$ ). These two different size classes of C-values also fit Manton's (1950) observations that species in subgenus *Equisetum* characteristically had smaller chromosomes than species in subgenus *Hippochaete*. Recent phylogenetic work by Des Marais *et al.* (2001) showed that the two subgenera are sister groups with the basal group of *Equisetum* represented by *E. bogotense*. The C-value for this species is currently unknown but it will be useful for identifying the direction of C-value evolution within this genus.

## CONCLUSIONS AND FUTURE PROSPECTS

The new estimates for 30 species have nearly doubled the number of C-value data available for pteridophytes to 62. However, with approx. 9000 extant species, much remains to be done. In particular, more data are needed to extend taxonomic representation in both the lycophyte and horsetail-fern clades to determine more fully the pattern of C-value evolution in this group of vascular plants. Key gaps that remain unfilled include: (1) representative species from the lycophyte families Lycopodiaceae and Isoetaceae; (2) representative species in the heterosporous water fern families Marsileaceae and Salviniaceae; (3) species in the gleichenioid fern family Gleicheniaceae; and (4) a representative species from the genus *Lygodium*. With increased understanding of the size of the ancestral genome in gymnosperms and angiosperms (Leitch *et al.*, 1998, 2001), information on ancestral C-values in the lycophyte and horsetail fern clade will be invaluable for providing a comprehensive view of C-value evolution throughout vascular plants.

## ACKNOWLEDGEMENTS

The authors acknowledge the help of Margaret Johnston and Rebecca Brown in obtaining some of the chromosome counts. The first author acknowledges the financial contribution from the Austrian Science Foundation for the following projects: P 12674-GEN and P 14607-BOT.

## LITERATURE CITED

- Abraham A, Ninan CA, Mathew PM. 1962. Studies on the cytology and phylogeny of the pteridophytes VII. Observations on one hundred species of South Indian ferns. *Journal of the Indian Botanical Society* **41**: 339–421.
- Bennett MD, Leitch IJ. 1995. Nuclear DNA amounts in angiosperms. *Annals of Botany* **76**: 113–176.
- Bennett MD, Leitch IJ. 2001. Nuclear DNA amounts in pteridophytes. *Annals of Botany* **87**: 335–345.
- Bennett MD, Smith JB. 1976. Nuclear DNA amounts in angiosperms. *Philosophical Transactions of the Royal Society Series B* **274**: 227–274.
- Bennett MD, Smith JB. 1991. Nuclear DNA amounts in angiosperms. *Philosophical Transactions of the Royal Society Series B* **334**: 309–345.
- Bennett MD, Bhandol P, Leitch IJ. 2000. Nuclear DNA amounts in



- angiosperms and their modern uses – 807 new estimates. *Annals of Botany* **86**: 859–909.
- Bouchard RA.** 1976. *DNA amount and organisation in some lower vascular plants*. PhD Thesis, University of Chicago, USA.
- Cavalier-Smith T.** 1985. *The evolution of genome size*. Chichester: John Wiley & Sons Ltd.
- DesMarais DL, Pryer KM, Smith AR.** 2001. Phylogeny, character evolution, and biogeography of extant horsetails (*Equisetum*). <http://www.botany2001.org/section11/abstracts/15.shtml>
- Dolezel J, Sgorbati S, Lucretti S.** 1992. Comparison of three DNA fluorochromes for flow cytometric estimation of nuclear DNA content in plants. *Physiologia Plantarum* **85**: 625–631.
- Galbraith DW, Harkins KR, Maddox JM, Ayres NM, Sharma DP, Firoozabady E.** 1983. Rapid flow cytometric analysis of the cell cycle in intact plant tissues. *Science* **220**: 1049–1051.
- Grime JP, Hodgson JG, Hunt R.** 1988. *Comparative plant ecology: a functional approach to common British species*. London: Unwin Hyman.
- Hanson L, McMahon KA, Johnson MAT, Bennett MD.** 2001. First nuclear DNA C-values for 25 angiosperm families. *Annals of Botany* **87**: 251–258.
- Hauke RL.** 1963. A taxonomic monograph of the genus *Equisetum* subgenus *Hippochaete*. *Nova Hedwigia* **8**: 1–12.
- Hauke RL.** 1978. A taxonomic monograph of the genus *Equisetum* subgenus *Equisetum*. *Nova Hedwigia* **30**: 1–385.
- Khandelwal S.** 1990. Chromosome evolution in the genus *Ophioglossum* L. *Botanical Journal of the Linnean Society* **102**: 205–217.
- Klekowski EJ, Baker HG.** 1966. Evolutionary significance of polyploidy in the Pteridophyta. *Science* **153**: 305–307.
- Leitch IJ, Chase MW, Bennett MD.** 1998. Phylogenetic analysis of DNA C-values provides evidence for a small ancestral genome size in flowering plants. *Annals of Botany* **82**: 85–94.
- Leitch IJ, Hanson L, Winfield M, Parker J, Bennett MD.** 2001. Nuclear DNA C-values complete familial representation in Gymnosperms. *Annals of Botany* **88**: 843–849.
- Löve A, Löve A, Pichi Sermolli REG.** 1977. *Cytotaxonomical atlas of the Pteridophyta*. Vaduz: J. Cramer.
- Loyal DS.** 1972. Chromosome size and structure in some heterosporous ferns with a bearing on evolutionary problems. In: Kachroo PN, ed. *Advancing frontiers in cytogenetics and improvement of plants*. New Delhi: Hindustan Publishing Corporation, 293–299.
- Mabberley DJ.** 1997. *The plant book*. Cambridge: Cambridge University Press.
- Manton I.** 1950. *Problems of cytology and evolution in the Pteridophyta*. Cambridge: Cambridge University Press.
- Marie D, Brown SC.** 1993. A cytometric exercise in plant DNA histograms, with 2C values for 70 species. *Biology of the Cell* **78**: 41–51.
- Michaelson MJ, Price HJ, Ellison JR, Johnston JS.** 1991. Comparison of plant DNA contents determined by Feulgen microspectrophotometry and laser flow cytometry. *American Journal of Botany* **78**: 183–188.
- Nakato N.** 1996. Notes on chromosomes of Japanese pteridophytes (4). *Journal of Japanese Botany* **71**: 163–167.
- Obermayer R, Greilhuber J.** 1999. Genome size in Chinese soybean accessions – stable or variable? *Annals of Botany* **84**: 259–262.
- Price HJ, Johnston JS.** 1996. Analysis of plant DNA content by Feulgen microspectrophotometry and flow cytometry. In: Jauhar PP, ed. *Methods in genome analysis in plants*. New York: CRC Press, Inc.
- Pryer KM, Schneider H, Smith AR, Cranfill R, Wolf PG, Hunt JS, Sipes SD.** 2001. Horsetails and ferns are a monophyletic group and the closest living relatives to seed plants. *Nature* **409**: 618–622.
- Redondo N, Blanco A, Horjales M.** 1999a. Estudio del género *Polypodium* L. del noroeste Ibérico: Cantidades de DNA nuclear. *Nova Acta Científica Compostelana (Biología)* **9**: 109–116.
- Redondo N, Horjales M, Blanco A.** 1999b. Cantidades de DNA nuclear eporas en Aspleniaceae: *Asplenium* L. *Phyllitis* Hill *Ceterach* Willd. y *Polypodium* L. *Nova Acta Científica Compostelana (Biología)* **9**: 99–107.
- Wolf PG, Pryer KM, Smith AR, Hasebe M.** 1998. Phylogenetic studies of extant pteridophytes. In: Soltis DE, Soltis PS, Doyle JJ, eds. *Molecular systematics of plants II: DNA sequencing*. Norwell, MA: Kluwer Academic Publishers, 541–556.
- Yokoya K, Roberts AV, Mottley J, Lewis R, Brandham PE.** 2000. Nuclear DNA amounts in roses. *Annals of Botany* **85**: 557–562.
